# Supplementary material for: Phase evolution of Cu2ZnSnS4 (CZTS) nanoparticles from in situ formed binary sulphides under solvothermal conditions
Source: Royal Society of Chemistry journal article supplement (doi:10.1039/d0ce01566k), 2021-01-01
Supplement: d0ce01566k1.pdf [file d0ce01566k1.pdf]

## Supporting Information

### Phase evolution of $\text{Cu}_2\text{ZnSnS}_4$ (CZTS) nanoparticles from in situ formed binary sulphides under solvothermal conditions

Rameez Ahmad,<sup>1,2</sup> Naeem-ul-Hasan Saddiqi,<sup>1,2</sup> Mingjian Wu,<sup>3,4</sup> Mirko Prato,<sup>5</sup> Erdmann Spiecker,<sup>3,4</sup> Wolfgang Peukert<sup>1,2</sup> and Monica Distaso<sup>1,2,\*</sup>

\* [monica.distaso@fau.de](mailto:monica.distaso@fau.de)

<sup>1</sup> Institute of Particle Technology, Friedrich-Alexander-Universität Erlangen-Nürnberg (FAU), Cauerstraße 4, 91058 Erlangen, Germany

<sup>2</sup> Interdisciplinary Center for Functional Particle Systems, Friedrich-Alexander-Universität Erlangen-Nürnberg (FAU), Haberstraße 9a, 91058, Erlangen, Germany

<sup>3</sup> Institute of Micro- and Nanostructure Research and Center for Nanoanalysis and Electron Microscopy (CENEM), Friedrich-Alexander-Universität Erlangen-Nürnberg (FAU), Cauerstraße 3, 91058 Erlangen, Germany

<sup>4</sup> Interdisciplinary Center for Nanostructure Films (IZNF), Friedrich-Alexander-Universität Erlangen-Nürnberg (FAU), Cauerstraße 3, 91058 Erlangen, Germany

<sup>5</sup> Materials Characterization Facility, Istituto Italiano di Tecnologia (IIT), Via Morego 30, 16163 Genoa, Italy

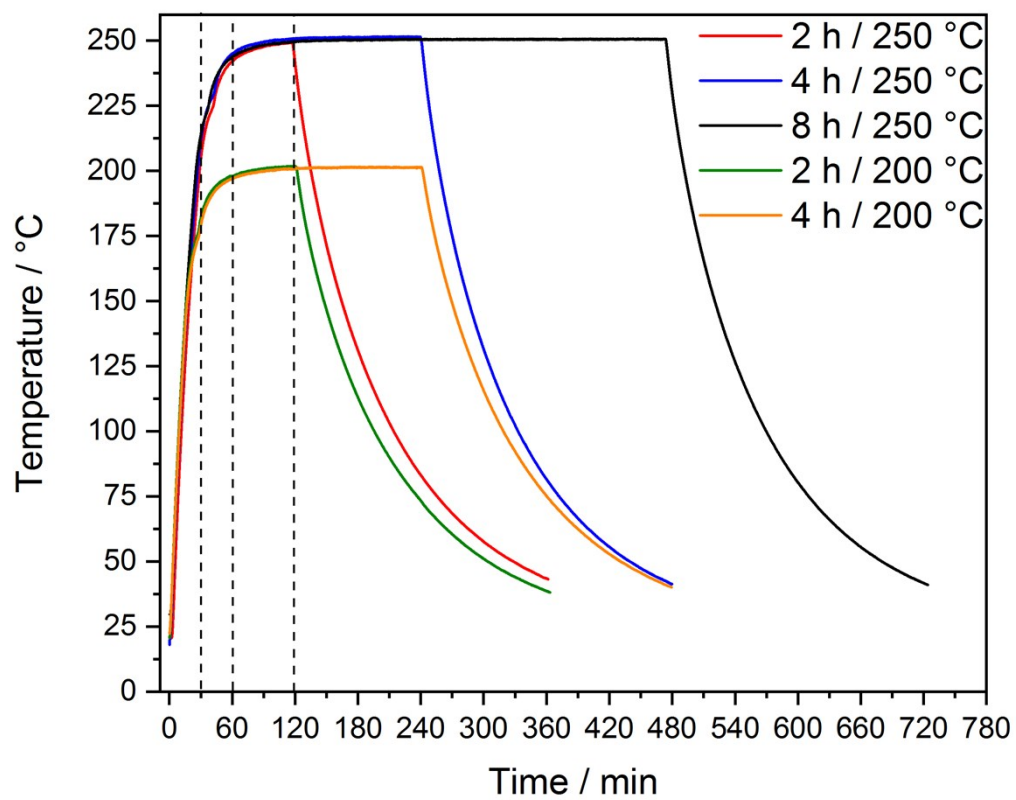

**Fig. S1.** Heating profiles at 200 °C and 250 °C for various time lengths.

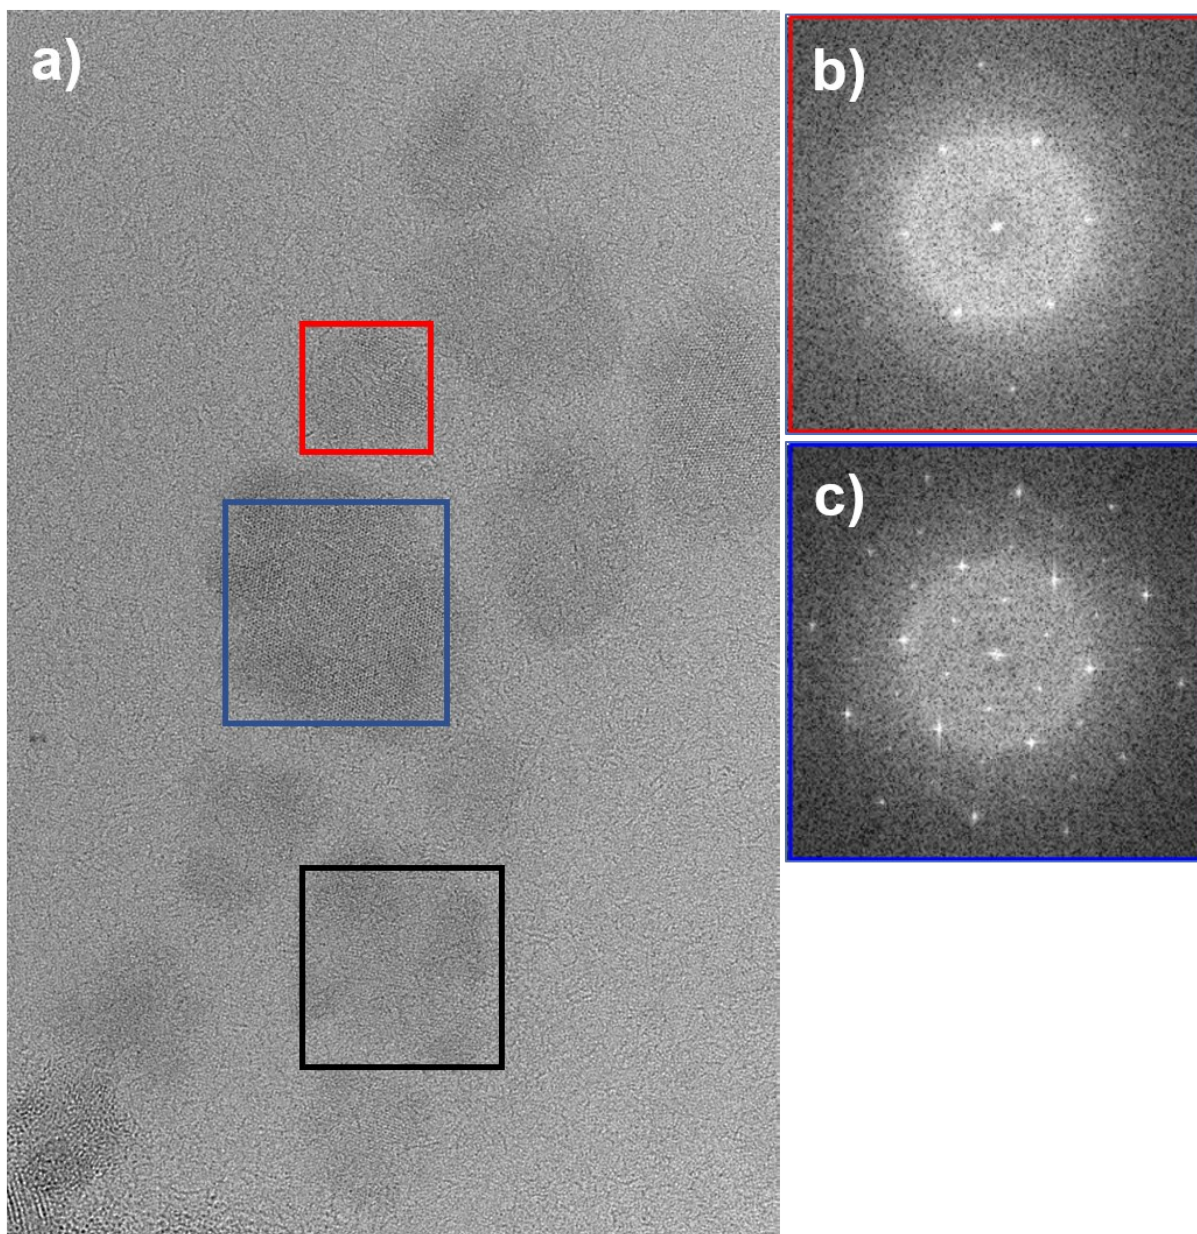

**Fig. S2.** HRTEM images and corresponding FT of particles synthesized at 250 °C for 2 h. The particle included in the black box is enlarged and analysed in Fig. S3.

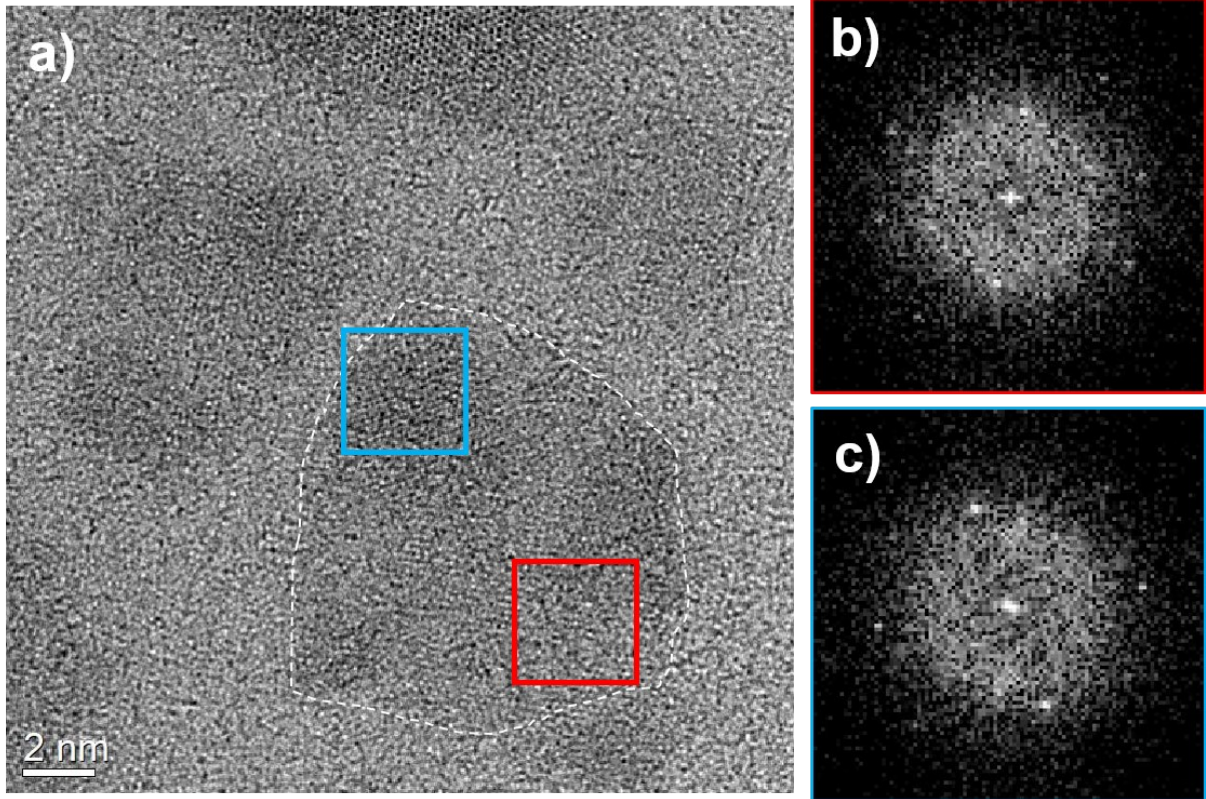

**Fig. S3:** The different lattice pattern and orientation across the same big particle indicate that the large particle might be assembled by smaller ones.

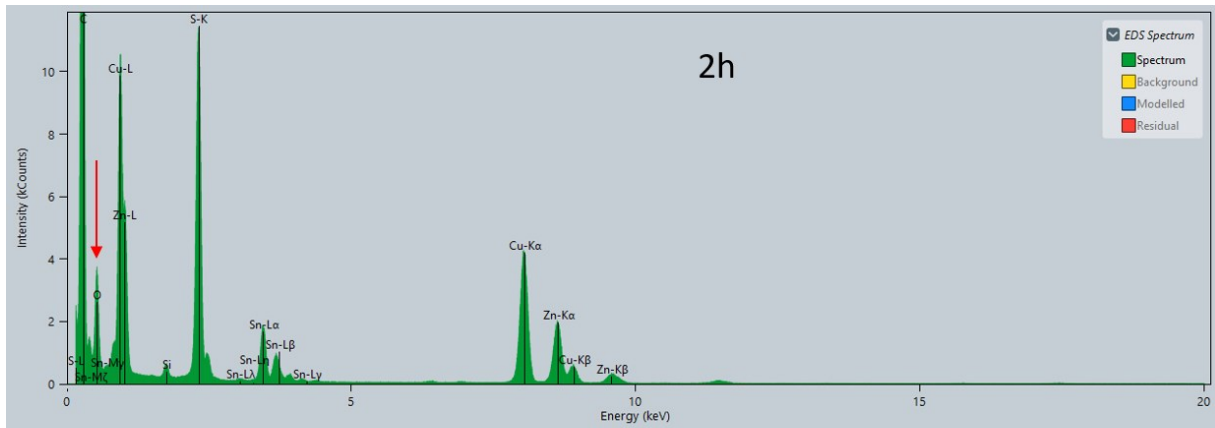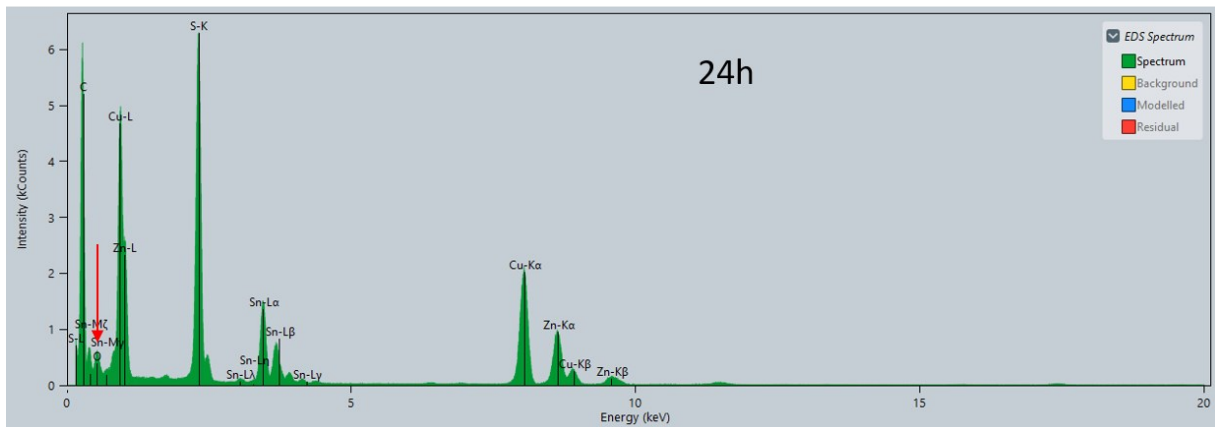

**Fig. S4.** Representative raw EDX signal from (top) 2h and (bottom) 24h sample.

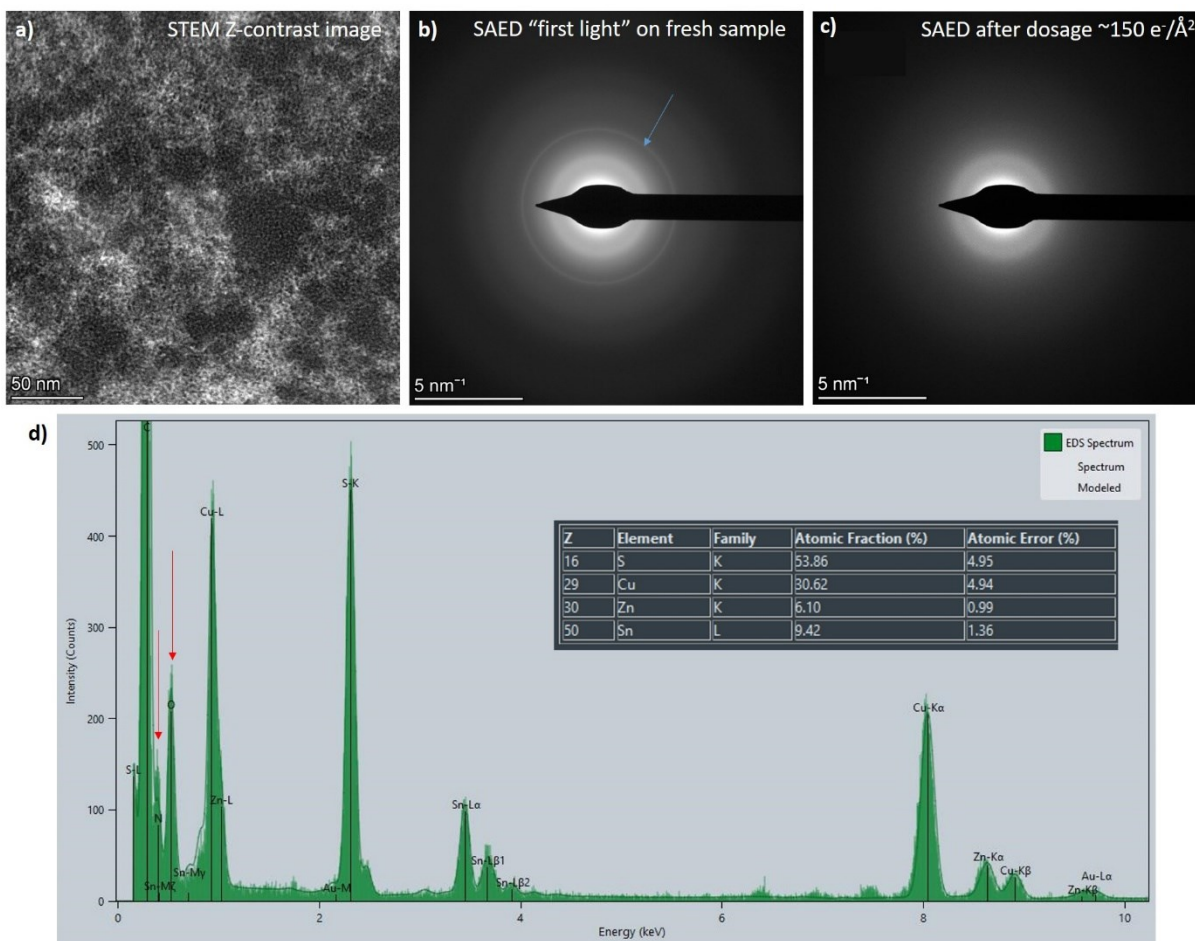

**Fig. S5.** TEM analysis of initial (0 h) sample. STEM Z-contrast image (a) reveal tiny particle embryos. Only one ring at  $3.6 \text{ nm}^{-1}$  is visible in selected area electron diffraction of fresh sample region (b), and it vanishes soon under a moderate dosage of  $\sim 150 \text{ e}^{-}/\text{\AA}^2\text{s}$  (c), which makes high resolution imaging not possible (HRTEM typically requires  $10^3 \text{ e}^{-}/\text{\AA}^2\text{s}$  on our microscope). (d) EDX signal from an area of  $\sim 500 \text{ nm}$  with dispersed particles.
